# Supplementary material
Source: publisher figshare collection journal article supplement (https://sage.figshare.com/ndownloader/files/20186337)

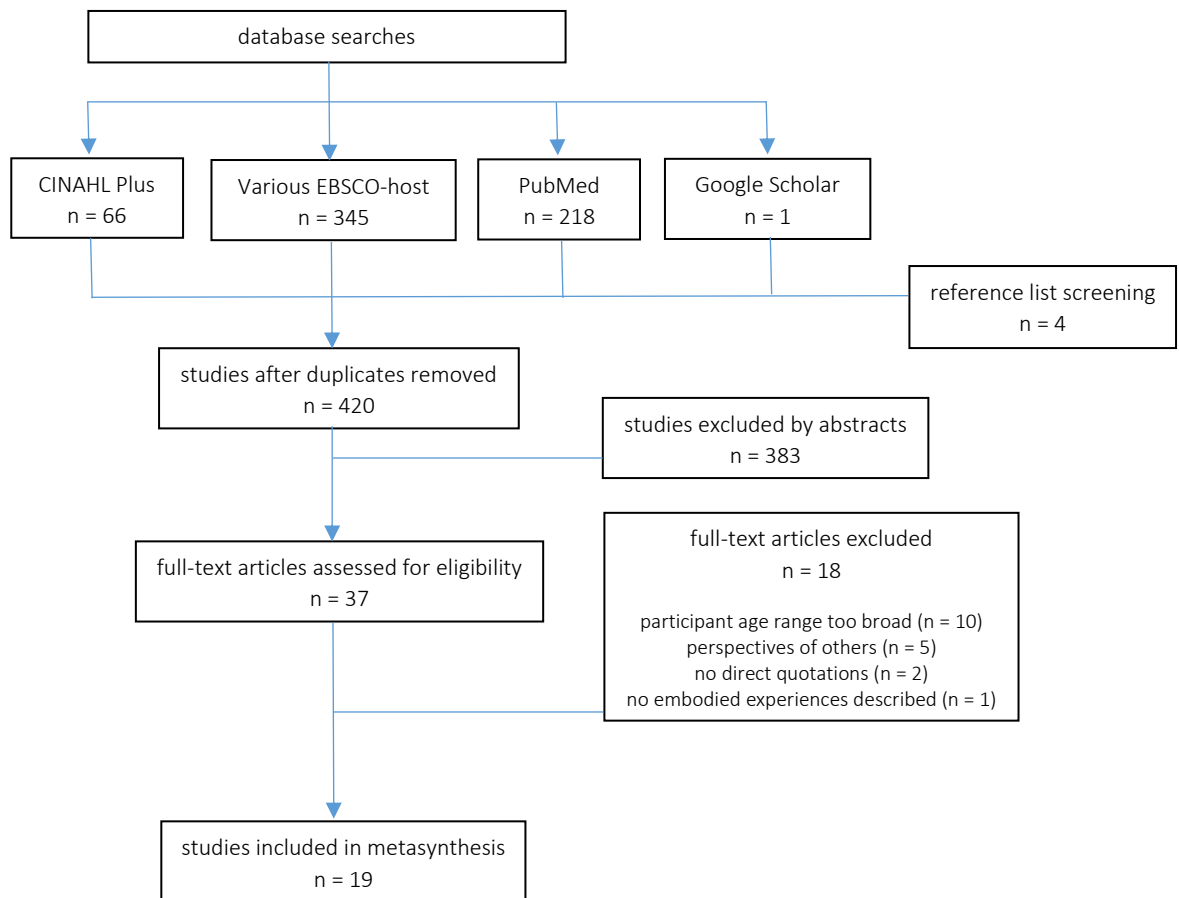

**Supplementary Figure 1.** Flowchart of study selection process

Supplement: Supplementary file 1 [file 20186337]
